# Sinusoidal voltage protocols for rapid characterization of ion channel kinetics

Kylie A. Beattie<sup>1,2</sup>, Adam P. Hill<sup>3,4</sup>, Rémi Bardenet<sup>5</sup>, Yi Cui<sup>6</sup>,  
Jamie I. Vandenberg<sup>3,4</sup>, David J. Gavaghan<sup>1</sup>, Teun P. de Boer<sup>7</sup>, Gary R. Mirams<sup>1,8</sup>

March 12, 2017

1. Computational Biology, Department of Computer Science, University of Oxford, OX1 3QD, UK.
2. Division of Applied Regulatory Science, Office of Clinical Pharmacology, Office of Translational Sciences, Center for Drug Evaluation and Research, Food and Drug Administration, Silver Spring, MD, USA.
3. Department of Molecular Cardiology and Biophysics, Victor Chang Cardiac Research Institute, Sydney, NSW 2010, Australia.
4. St Vincent's Clinical School, UNSW Sydney, Darlinghurst, NSW 2010, Australia.
5. CNRS & CRISAL, Université de Lille, 59651 Villeneuve d'Ascq, France.
6. Safety Evaluation and Risk Management, Global Clinical Safety and Pharmacovigilance, GlaxoSmithKline, Uxbridge, UB11 1BS, UK.
7. Division of Heart & Lungs, Department of Medical Physiology, University Medical Center Utrecht, Utrecht, The Netherlands.
8. Centre for Mathematical Medicine & Biology, School of Mathematical Sciences, University of Nottingham, NG7 2RD, UK.

## Abstract

Understanding the roles of ion currents is crucial to predict the action of pharmaceuticals and also to guide clinical interventions in the heart, brain and other electrophysiological systems. Our ability to predict how ion currents contribute to cellular electrophysiology is in turn critically dependent on the characterization of ion channel kinetics. We present a method for rapidly exploring and characterizing ion channel kinetics, using the hERG channel, responsible for cardiac  $I_{Kr}$  current, as an example. We fit a mathematical model to currents evoked by a novel 8 second sinusoidal voltage clamp. The model is then used to predict over 5 minutes of recordings in the same cell in response to further voltage clamp protocols, including a new collection of physiological action potentials. Our technique allows rapid collection of data from single cells, produces more predictive ion current models than traditional approaches, and will be widely applicable to many ion currents.

**Keywords:** hERG,  $I_{Kr}$ , mathematical model, cardiac, electrophysiology, parameter, inference, model validation, patch clamp, voltage-gated, ion channel, ion current, voltage protocol

## 17 1 Introduction

18 Mathematical models of ion channels are a quantitative expression of our understanding of the  
19 probability of the channel existing in different conformational states (typically, closed, open and  
20 inactivated) and the rates of transition between these states<sup>1,2</sup>. There have been some notable  
21 advances in deriving mathematical models for ion channel behavior<sup>3-7</sup>, with some stressing the  
22 need for validation/testing of the model using data from the same cell<sup>8</sup>. In this paper we present  
23 a new approach, based on novel short protocols and parameter inference techniques, which we  
24 demonstrate by constructing an improved ion channel model.

25 The *KCNH2* gene (also known as *hERG*) has been shown to encode the primary subunit of the  
26 voltage-gated ion channel Kv11.1 that carries the rapid delayed rectifier potassium current ( $I_{Kr}$ )<sup>9,10</sup>.  
27 In this article we focus on mathematical modeling of hERG channel kinetics, demonstrating our  
28 approach by constructing an improved model of this ion channel. hERG plays important roles in  
29 the brain<sup>11</sup>; gastrointestinal tract<sup>12</sup>; uterine contractions<sup>13</sup>; cell-proliferation and apoptosis<sup>14</sup> and  
30 cancer progression<sup>15</sup>, but  $I_{Kr}$  is best known as a repolarizing cardiac ion current. The channel is  
31 susceptible to binding and blockade by pharmaceutical compounds, which is strongly linked to many  
32 cases of drug-induced pro-arrhythmic risk<sup>16,17</sup>. Mathematical modeling of cardiac electrophysiology,  
33 including  $I_{Kr}$ , forms a core part of a new proposal for routine *in vitro* and *in silico* safety assess-  
34 ment to replace a human clinical drug safety study<sup>18,19</sup>. A wide range of different mathematical  
35 models have been proposed to describe  $I_{Kr}$  (details of literature models are given in Supplementary  
36 Material B, Table B1). We note that these models were developed to describe different species, cell  
37 types, temperatures and isoforms, so variation is to be expected. Figure 1 shows predicted current  
38 under three different voltage clamps for 29 literature models. Unfortunately, even models for the  
39 same conditions do not provide consistent predictions.

40 The first models of ion channel kinetics were proposed by Hodgkin & Huxley<sup>20</sup>, and relatively  
41 little has changed in the methods used for construction of mathematical models of ion channel gating  
42 since the original seminal work in 1952. The traditional approach is to fit peak currents and time  
43 constants of current activation/decay after clamping to fixed voltages; to assemble current/voltage  
44 ( $I-V$ ) and time-constant/voltage ( $\tau-V$ ) curves; and to describe these curves with interpolating  
45 functions. Condensed voltage-step protocols have been suggested as the basis of optimized experi-  
46 ments that provide information about ion channel kinetics faster than experiments to construct  $I-V$   
47 curves<sup>21,22</sup>; and optimized current and voltage step clamps have been used to optimize the fitting of  
48 maximal conductances in action potential models<sup>23</sup>. Single sinusoid voltage clamps have been pre-  
49 viously been explored for choosing between possible Shaker channel models that were parameterized  
50 using traditional voltage step clamps<sup>24</sup>.

51 In this study, we extend these ideas and propose an 8second sinusoid-based voltage protocol,  
52 designed to explore the kinetics of the hERG channel, and use this protocol to record hERG currents  
53 from CHO-cells that are over-expressing hERG1a. These recordings are then used to parameterize  
54 a mathematical model of the ion current. We then validate the model by predicting the response  
55 to both standard voltage-step protocols and physiologically-relevant action potential clamps: an  
56 unprecedentedly thorough independent validation for a model of ion channel kinetics. Our approach  
57 uses a substantially shorter experimental recording to construct the ion channel model than the usual  
58 approach based on time constants and peak currents from a series of voltage-step protocols. As a  
59 consequence of the high information content of the short protocol, we are able to generate cell-specific  
60 models that advance our understanding of variability of ion currents between cells. Our methodology  
61 will be applicable to many ion channels, both in the heart and other electrophysiological systems.

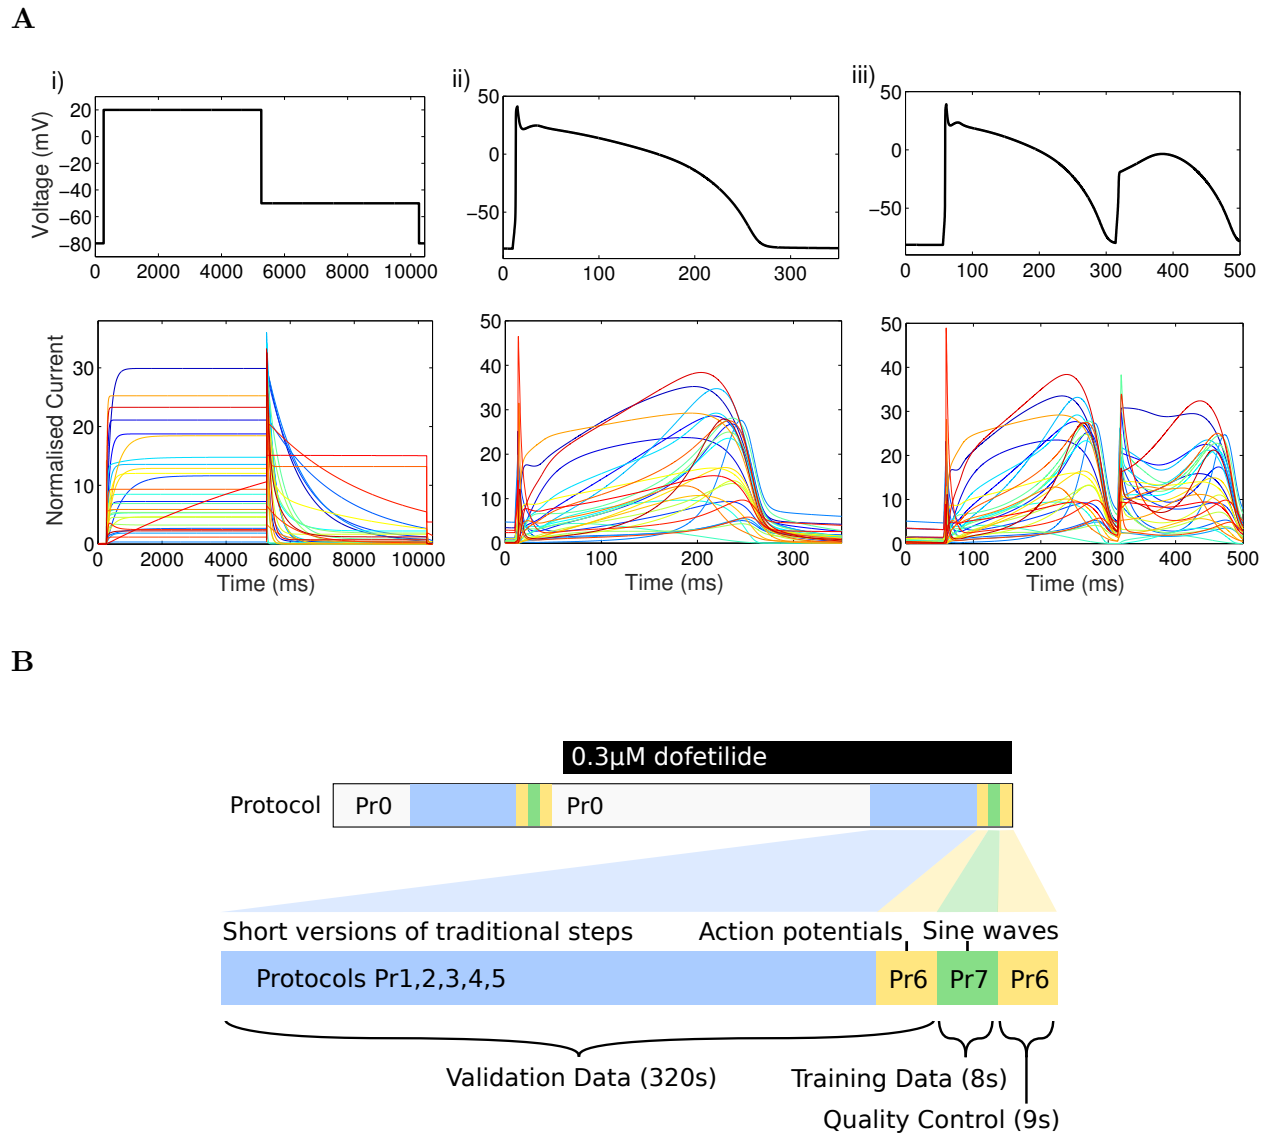

Figure 1: **Current predictions from literature models of  $I_{Kr}$ , and diagram of the experimental procedure used in this study.** **A:** predictions from 29 literature models of  $I_{Kr}$  in response to different voltage-clamp protocols: (i) a voltage-step; (ii) an action potential; and (iii) an action potential displaying pathological properties. Currents are normalized such that the maximal conductance is equal to one; i.e. we plot the open probability multiplied by the driving voltage (model references are listed in Table B1 in Supplementary Material B). **B:** top — a schematic representation of the experimental procedure used for this study over time (not to scale). A simple activation step protocol is repeated in the sections marked ‘Pr0’, before moving on to the highlighted section (enlarged below) where data used in the study were recorded. The recording protocols ‘Pr1–7’ are performed twice, once before dofetilide addition, and once after, with the hERG current isolated by subtraction. For full details of the protocols please refer to the Online Methods 4.2.

## 62 2 Results

### 63 2.1 Experimental Protocol

64 In Figure 1B we provide an overview of the experimental approach, denoting the sequence of voltage  
65 clamp protocols we performed as Pr0–Pr7. In each cell we recorded: a series of more conventional  
66 voltage-step protocols designed to explore activation (Pr1–3), inactivation (Pr4) and deactivation  
67 (Pr5); a new protocol composed of a series of action potential clamps (Pr6 — composed from  
68 simulated action potentials from models representing diverse species, pacing frequencies, and in  
69 both healthy and repolarization-failure conditions); and our new 8 s sinusoidal voltage protocol  
70 (Pr7, shown in Figure 2, full details of all protocols are given in the Online Methods 4.2).

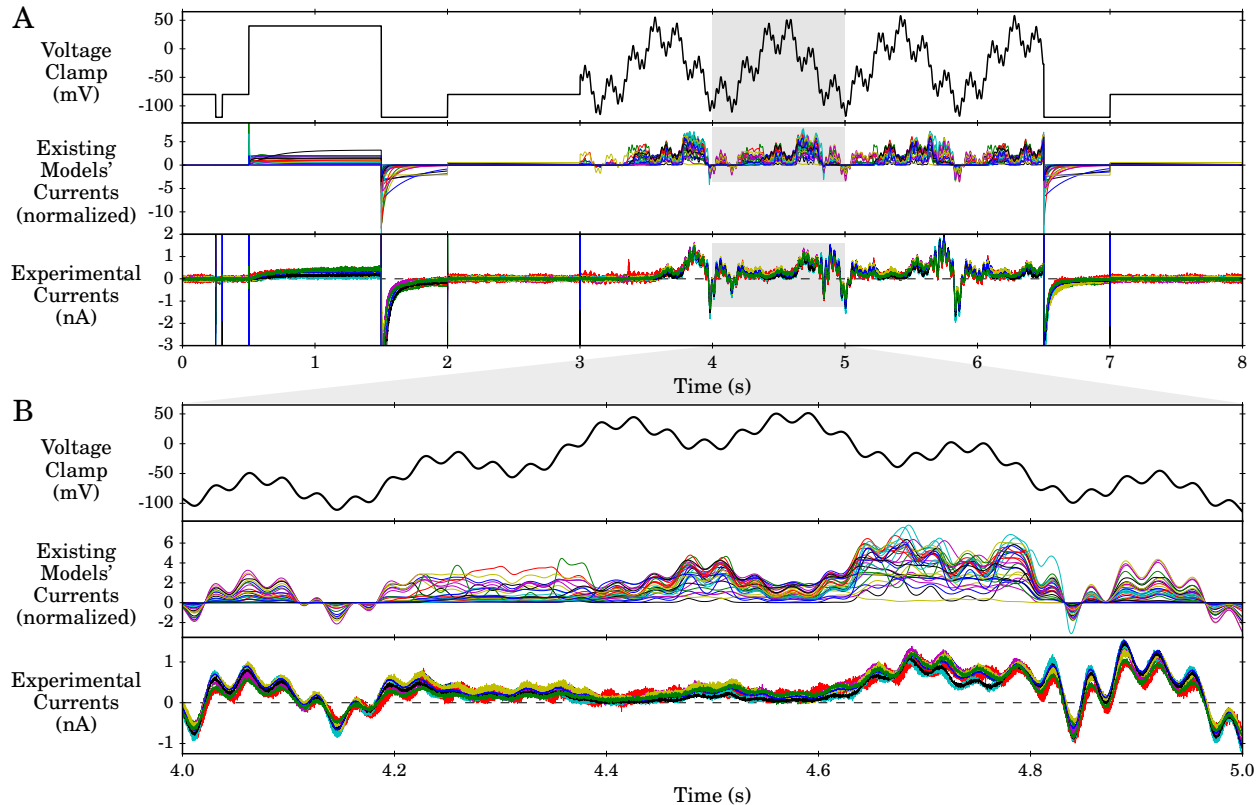

Figure 2: **The sine wave protocol and example recordings.** **A: Top row:** The full sinusoidal voltage protocol (Pr7). **Middle row:** Simulations of expected behavior in response to this protocol from existing  $I_{K_r}$  and hERG models, normalized by scaling the conductance value for each model to minimize the absolute difference between each trace and a reference trace. For calculation of the reversal potential, a temperature of 21.5 °C was used to match the mean experimental conditions. **Bottom row:** Raw data (following leak and dofetilide subtraction) from experimental repeats at room temperature from 9 cells. Experimental traces have been scaled, to remove the effect of different maximal conductances, by a factor chosen to minimize the absolute differences between each trace and a reference experimental trace (that with the peak current during the sine wave portion of the sine wave protocol). **B:** an enlargement of the highlighted sections of panel A. Whilst there is some variation between cells in the experimental results, they are much more consistent than the predictions from the different models.

71 In Figure 2 we present the novel sinusoidal protocol Pr7, the simulated predicted currents

72 from existing models, and the responses we recorded using the whole-cell patch clamp technique  
73 with hERG 1a-transfected CHO cells (details of the experimental methodology can be found in  
74 the Online Methods 4.1.1–4.1.3). The protocol is comprised of simple voltage steps and a main  
75 sinusoidal section that is in the form of a sum of three sine waves of different amplitudes and  
76 frequencies, here optimized to rapidly explore hERG channel kinetics. The steps are included to  
77 measure leak current and to provoke a large current to help identify maximal conductance (found  
78 to be helpful in preliminary work, see Supplementary Material A2.1). The frequencies of the sine  
79 waves are selected to cover the range of characteristic time constants known to occur in hERG  
80 channel gating (from millisecond to second timescales)<sup>25,26</sup>, whilst avoiding harmonics that would  
81 lead to repetitive in-phase signals. The amplitudes of the sine waves are selected to sweep over  
82 physiological voltage ranges. Details of the protocol parameters and an equation for the protocol  
83 are given in Online Methods 4.2.

84 The sine wave protocol is of only eight seconds duration, which enables: efficient data collection,  
85 with training and validation data collected from the same cell; and the chance to make multiple  
86 interventions (such as the addition of drug compounds) since we can re-measure the full set of ion  
87 channel kinetics multiple times. The new protocol provokes from the existing literature  $I_{K_r}$  models  
88 an even wider array of different behaviors (middle panels in Figure 2A & B) than the existing  
89 voltage step or action potential clamps (Figure 1A); even among models constructed in/for similar  
90 conditions/species.

91 We recorded the full set of voltage protocols (Pr1–7) twice. After the first set of recordings,  
92 in vehicle conditions, we add a moderate dose of dofetilide ( $0.3 \mu\text{M}$ ), allow the dofetilide-induced  
93 current block to reach equilibrium, and then repeat the full set of recordings. We leak-subtract  
94 each set of Pr1–7 recordings using the leak step at the beginning of Pr7 to estimate leak current  
95 resistance. Finally we subtract (the already leak-subtracted) second set of recordings from the first  
96 set, to obtain ‘dofetilide subtracted’ current traces, predominantly composed of dofetilide-sensitive  
97 hERG current. This procedure minimizes contributions from any endogenous currents (see Online  
98 Methods 4.4).

## 99 2.2 Model Calibration

100 We calibrate a mathematical model using only the sine wave protocol Pr7. The Hodgkin-Huxley<sup>20</sup>  
101 structure of the model we use, and its corresponding model parameters, can be seen in Figure 3B.  
102 We independently fitted this model to each of the experimental current traces shown in Figure 2.  
103 For each cell, we obtain a probability distribution of estimates for each parameter that captures any  
104 observational uncertainty in the parameter values<sup>27,28</sup>. We used a global minimization algorithm<sup>29</sup>  
105 followed by a custom-written Monte Carlo based Bayesian inference method (assuming uniform  
106 prior distributions, see Online Methods 4.7).

107 The result of the fitting procedure for one cell is shown in Figure 3. The parameter set with  
108 maximum posterior density is shown in Figure 3A, demonstrating an excellent fit between experi-  
109 mental and simulated data. The resulting posterior probability density for the parameters obtained  
110 from this Bayesian inference approach is projected across each parameter in Figure 3C. We also  
111 tested that our approach is theoretically appropriate for inferring all parameters by using synthetic  
112 data studies, as described in Supplementary Material C. The plausible parameter space is very  
113 narrow: if multiple parameter set samples are taken from the distribution shown in Figure 3C, the  
114 resulting simulated current traces are indistinguishable to the eye. To quantify this, taking 1000  
115 samples we find that the 95% credible intervals for the simulated currents were always within at  
116 most either 3.45% or, in absolute terms, 0.0044 nA of the simulated current given by the maximum  
117 posterior density parameter set.

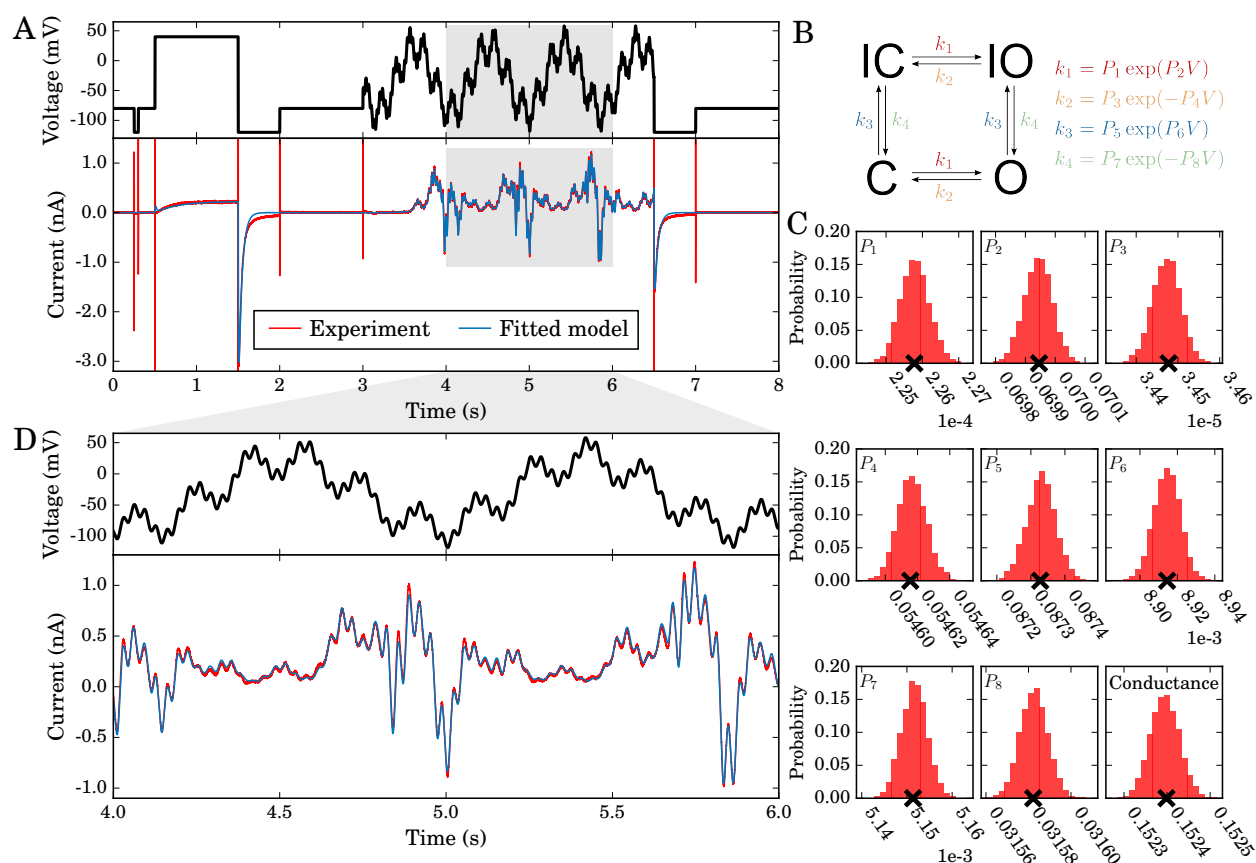

Figure 3: **Model calibration.** **A:** Top: the entire 8 second training protocol, bottom: an experimental recording with the fitted model simulation overlaid (portion of the sine wave enlarged in panel D). This simulation uses the maximum posterior density parameter set, denoted with crosses in panel C. **B:** The model structure in Markov state diagram format, note that the symmetric transition rates mean this is equivalent to a Hodgkin & Huxley<sup>20</sup>-style model with two independent gates. Parameter values  $P_1$  to  $P_8$  define voltage ( $V$ )-dependent transitions ( $k$ ) between conformational states. **C:** posterior distribution of single-cell derived model parameters. Probability density distributions are shown for each parameter after fitting to the experimental data shown in panel A. The parameter numbering corresponds to that shown in panel B. Crosses indicate the parameter set with the maximum posterior density. The standard deviation of each of these distributions is less than 0.5% of the maximum posterior density value. **D:** an enlargement of the highlighted region of panel A.

118 The results we present in Figure 3 are from a single cell with a good quality recording and a high  
119 signal:noise ratio (this choice of cell, and other cells' predictions, are discussed later). We fit models  
120 on a cell-specific basis, and then also use averaged experimental data to create a single 'averaged'  
121 model as described in Supplementary Material F. We will compare these approaches below. We  
122 provide all parameter values with the maximum posterior density for all models in Supplementary  
123 Table F11.

## 124 2.3 Validation predictions

125 Having trained our model to eight seconds of experimental data from the sine wave protocol Pr7, we  
126 now test its ability to predict more than 5 minutes of independent experimental behavior. We predict  
127 the current in response to traditional voltage-step protocols Pr1–5 (adapted from those previously  
128 used in the literature<sup>1</sup>), and also to a novel physiologically-inspired voltage clamp protocol comprised  
129 of multiple action potentials (Pr6). All recordings shown in Figures 3–5 are from the same cell,  
130 using the experimental procedure shown in Figure 1B.

131 To make the predictions for Protocols Pr1–6 we performed simulations using the parameter set  
132 with the maximum posterior density in the fit to the sine wave (Pr7). As with the calibration  
133 protocol, all the predictions we will discuss below are indistinguishable by eye from the result of  
134 taking multiple samples from the distributions in Figure 3C and plotting a prediction for each of  
135 these parameter sets. We also compare the predictions from our new model with those from a  
136 sample of widely-used literature models<sup>25,30–33</sup>.

137 In Figure 4, we show traditional voltage step protocols, experimental recordings and the sim-  
138 ulated predictions from the model. We also show some of the usual summary curves of the data,  
139 together with predicted summary curves from our model and a range of existing literature models  
140 (methods used to derive summary plots are given in the Online Methods 4.5, results for Pr1&2  
141 in Supplementary Material E). We can predict a wide range of current behavior in response to  
142 the standard voltage-step protocols, without having used any of this information to fit the model.  
143 Many of the current-voltage relationships and time constant-voltage relationships we predict in re-  
144 sponse to the traditional voltage-step protocols are closer to the experimental data than similar  
145 model-experiment comparisons in the literature (even when existing literature models, with more  
146 parameters, were fitted to similar data).

147 Figure 5 shows the model prediction of the currents invoked in response to the physiologically-  
148 inspired action potential protocol Pr6, compared with the experimental recording (as shown in  
149 Figure 1B we used the first repeat of Pr6 for validation purposes, and the second as a quality  
150 control measure). Replicating behavior under action potentials is perhaps the most important  
151 requirement for a hERG channel model for use in physiological or pharmacological studies. The  
152 model is able to predict the response to all of the complex action potential protocol extremely well,  
153 and much better than existing models (even though we have scaled literature models' maximal  
154 conductances ( $G_{Kr}$ ) to fit this trace as well as possible in Figure 5).

155 We provide a quantitative comparison of predicted current traces for our model and each of  
156 the literature models for Pr3–7 in Supplementary Table D6. In each case, the worst-performing  
157 literature model is a Hodgkin-Huxley style model. Yet our simple model, with the same structure, is  
158 able to provide significantly better predictions than even the Markov-type models, which are usually  
159 considered to be better representations of hERG kinetics<sup>1</sup>. Our methodology has resulted in a simple  
160 and highly predictive mathematical model, able to describe a wide range of physiologically-relevant  
161 behavior.

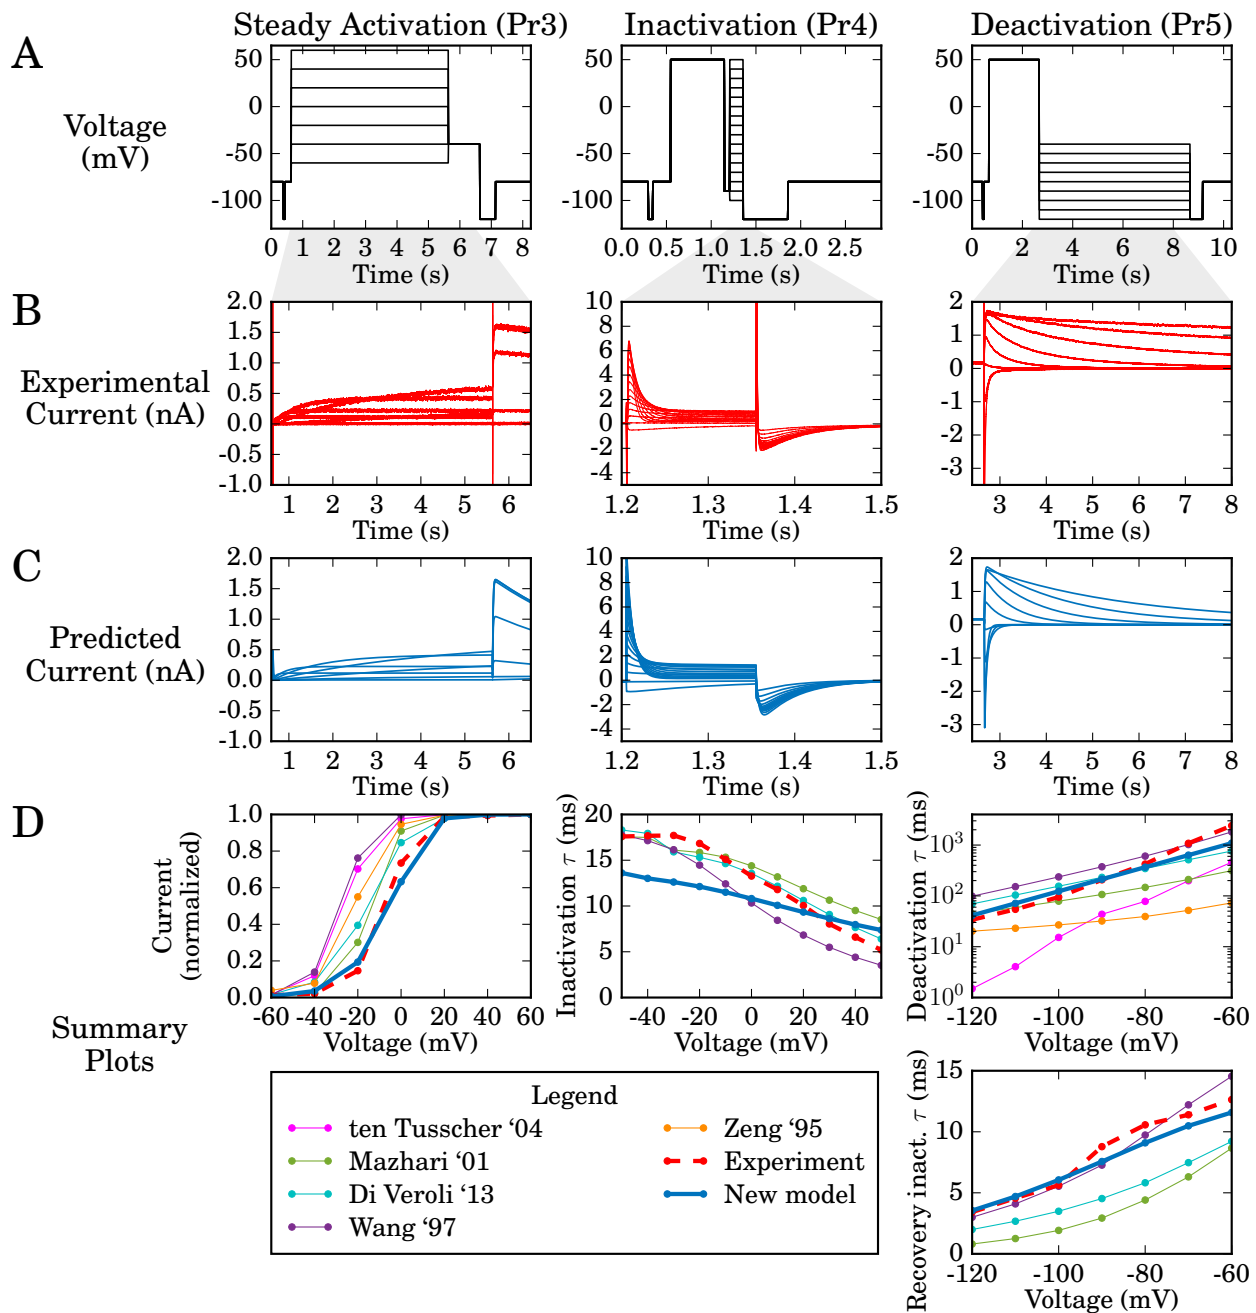

Figure 4: **Validation predictions — currents in response to traditional voltage step protocols.** Each column of graphs corresponds to a validation step protocol: those commonly used to study steady state activation, inactivation and deactivation (Pr3, Pr4, Pr5 in Figure 2) respectively. **A:** the voltage protocols. **B:** experimental current traces. **C:** model response — all are predictions using the maximum posterior density parameter set indicated in Figure 3C calibrated to just the sine wave protocol. **D:** summary curves, either current–voltage (I–V) or time constant–voltage ( $\tau$ -V) relationships. These plots summarize the results in the relevant column. The model prediction is shown in blue bold throughout, and the experimental recording with a dashed red line. Note that the deactivation time constant we plot here is a weighted tau, described in Online Methods 4.5. Note that some literature model predictions are missing from the summary plots as we were either unable to fit exponential curves to ‘flat’ simulation output reliably; or the exponential decay occurred in the opposite direction to experimental traces, and we considered the comparison unwarranted.



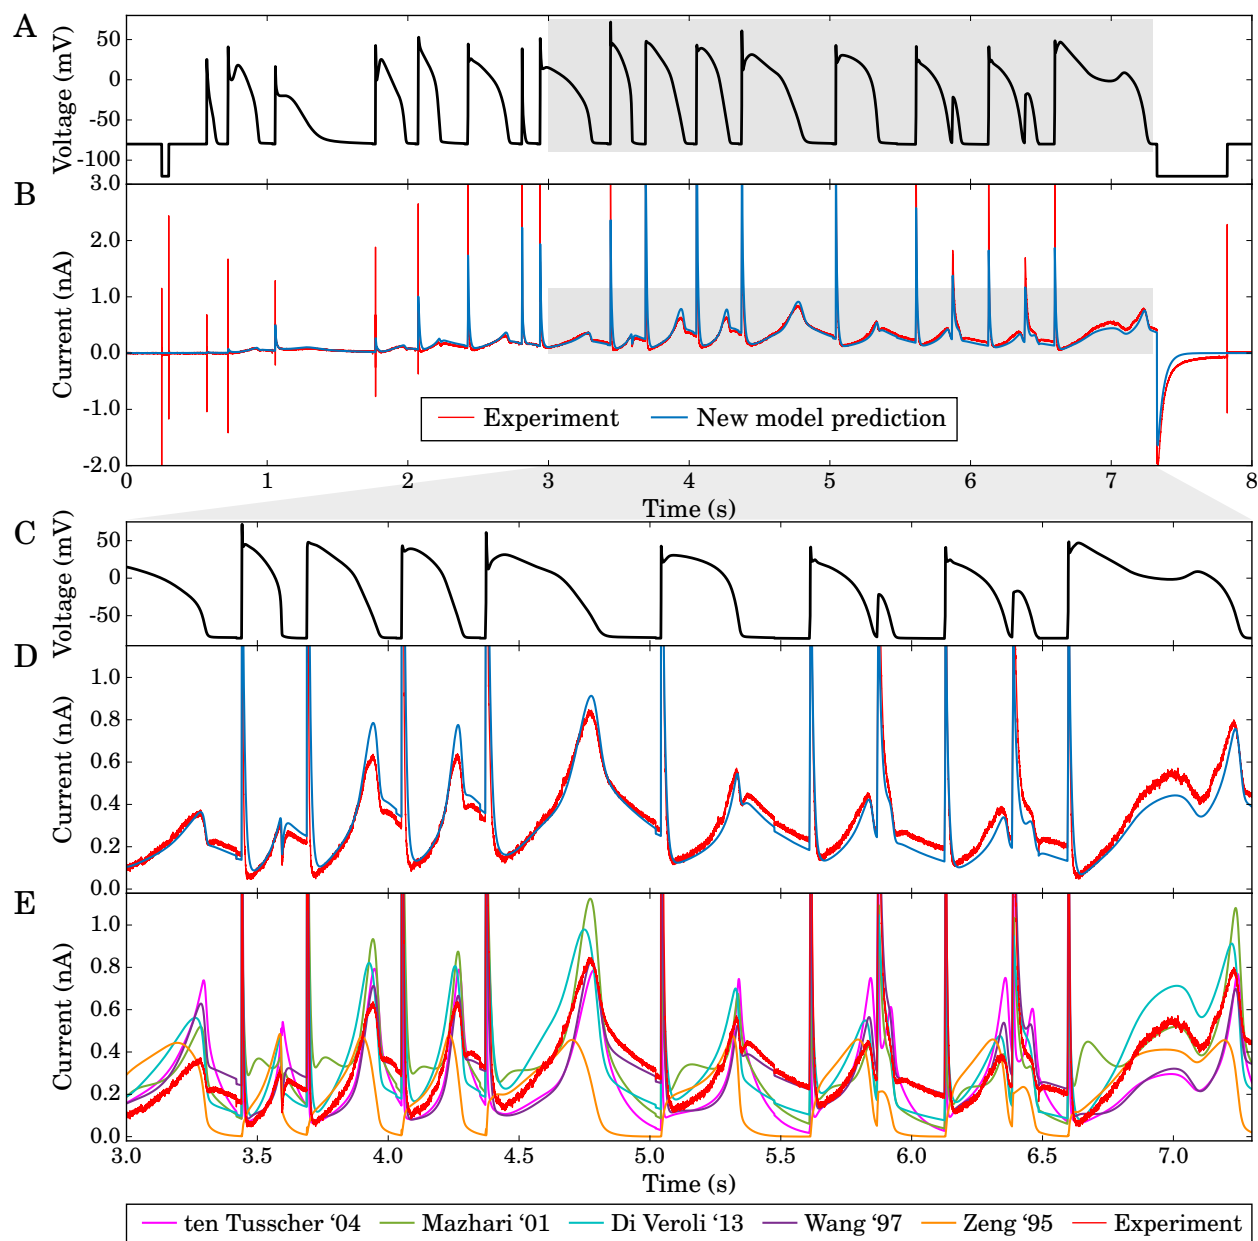

Figure 5: **Validation prediction — the current in response to the action potential protocol.** **A:** the voltage clamp protocol. **B:** a comparison of the experimental recording (red) and new model prediction (blue). **C & D:** enlargements of the highlighted regions of panels A & B. **E:** the same view of the experimental data in panel D, but here compared with predictions from literature  $I_{K_r}$  models. Conductance,  $G_{K_r}$ , is scaled for each of the literature models to give the least square difference between their prediction and these experimental data, i.e. we display a best-case scaling for each of these models. A quantification of the error in our model prediction versus these literature models is given in Supplementary Table D6: the performance shown in panels D and E holds for the whole trace, so the mean error in predicted current across the whole protocol is between 18% and 211% larger for the literature models' predictions than for our sine-wave fitted model.

### 162 **2.3.1 Cell-specific validation**

163 In Figure 6A we present the maximum posterior density parameter values when repeating the above  
164 approach using data from nine different cells. The clustered parameter values demonstrate that  
165 parameters derived from different cells take similar values, giving us confidence that the procedure is  
166 reproducible and biophysically meaningful. There is more cell-to-cell variability in some parameters  
167 than others, which may be related to variability in the underlying physiological processes that  
168 they represent; supporting the value, and perhaps necessity, of a cell-specific approach. We also  
169 acknowledge that some parameters may be more or less sensitive to variability in experimental  
170 conditions such as temperature, residual background/endogenous currents, and imperfect dofetilide  
171 and/or leak subtraction.

172 We order the cells in Figure 6 based on the lowest difference in leak resistance between the  
173 vehicle and dofetilide recordings of Pr7. This ordering gives a measure of recording stability, and is  
174 intended to be a surrogate for data quality. The cell presented above, in Figures 3–5, corresponds to  
175 Cell #5 of 9 under this ranking, so we obtain very good predictions even with our ‘median’ quality  
176 data. We show cell-specific predictions of the current-voltage relationship for the peak steady-state  
177 activation current for each cell-specific model in Figure 6B. While we focus on Cell #5 in the  
178 main text, Cells #1–4 also produce excellent cell-specific predictions (similar comparisons for other  
179 summary plots are in Supplementary Figures F8–F10).

180 We also investigated the benefit in a cell-specific approach by building a model using averaged  
181 experimental data from all nine cells. We describe this approach in Supplementary Material F, and  
182 summarize the results in Supplementary Table F12. Generally, for the cells with the highest data  
183 quality (Cells #1–5) the cell-specific models provide better predictions than the average model, as  
184 we see for Pr4 when comparing colored cell-specific predictions and experiment with the black line  
185 for the average model in Figure 6B. The same trend holds for the action potential protocol Pr6,  
186 in 6/9 cells the cell-specific model provides less error than the average cell model — the largest  
187 improvement was 37% less error; for the remaining 3/9 cells where the average cell model provided  
188 better predictions, this was by at most 6%.

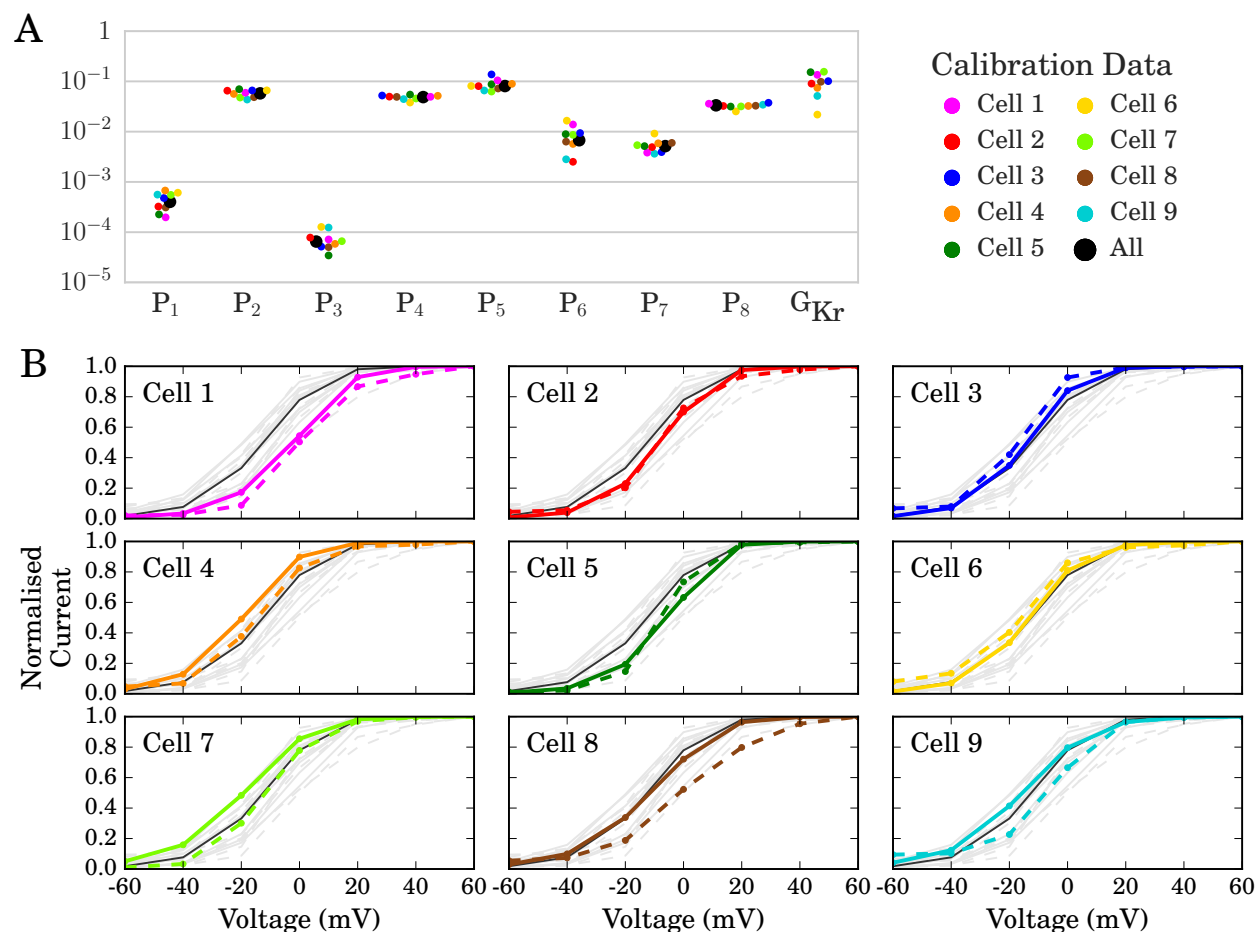

Figure 6: **Cell-specific model parameters, and comparison of their predictions with cell-specific experimental results.** (A:) Plot of parameters (maximum posterior density values) for nine cells obtained from training the model to the sinusoidal voltage protocol recorded on nine different cells, together with parameters calibrated to average data (N.B. not the average of the cell-specific parameters). The full set of parameter values are shown in Supplementary Material Table F11 and the distributions for each parameter shown in Figure F7. (B:) Comparison of cell-specific model predictions to cell-specific experimental recordings for the steady-state peak current I–V curves. Each plot represents a different cell, model predictions are depicted by a bold colored line, and dashed lines show values derived from the experimental data. The black lines (same on each plot) represent the prediction from the model calibrated to averaged data (all of the cells’ data). Each subplot contains all of the other cells’ recordings and predictions in light grey in the background to aid comparison and show the spread that we observed.

### 189 3 Discussion

190 In this paper we have presented a novel method for constructing mathematical models of ion channel  
191 kinetics. We used a sinusoidal voltage protocol to construct a simple model of hERG channel kinetics  
192 using just 8 seconds of recording, as opposed to a traditional approach that requires several minutes  
193 of voltage-step data. All of our experimental data can be collected from a single cell, whereas a  
194 typical approach necessitates the collection of data from a number of different cells.

195 The conceptual shift is that channel kinetics should be summarized by mathematical model  
196 parameters, not a series of current-voltage (I-V) and time constant-voltage curves. In essence, the  
197 model *is* the current characterization, rather than something designed to fit I-V and time constant  
198 curves, which only represent a certain subset of possible behaviors of the current. By fitting directly  
199 to the experimental current traces, instead of using summary curves, we can also reduce the possible  
200 influence of subjective choices during the time-constant fitting process.

201 We saw that our model is able to replicate the experimental training data very well (Figure 3).  
202 This is often the point at which literature approaches stop and conclude that a mathematical model  
203 is a good representation of ion channel kinetics (something that is also true more generally for  
204 mathematical models of biological processes). Instead, we performed an unprecedentedly thorough  
205 evaluation of the model by testing its ability to predict the behavior in response to a series of voltage  
206 clamp protocols it has not ‘seen before’ (both those traditionally used to characterize hERG channel  
207 kinetics, and also a new complicated series of action potential waveforms), all recorded from the  
208 same cell as the training data. The extremely good prediction from all our cell-specific models of  
209 the response to the complex action potential protocol is particularly remarkable (Figure 5). We are  
210 not aware of such a thorough, physiologically-relevant validation of an ion channel model having  
211 been performed before. Testing that we are able to predict the current response to a voltage pattern  
212 which may be observed in physiological or patho-physiological conditions is a particularly robust  
213 and useful way to validate a model, and critical if the  $I_{K_r}$  model is to be used to accurately predict  
214 cardiac electrical activity in healthy and potentially arrhythmic situations.

215 There are still some aspects of the experimental behavior that are not replicated by our model.  
216 In particular, there is only one time constant of deactivation, and low voltage-dependence in the  
217 inactivation time constant (Figure 4). But then neither is the full range of behavior captured by any  
218 of the existing, more complex, models available in the literature; and we have shown that our model  
219 can provide better predictions of all the raw currents than the literature models in the majority  
220 of cases, even where summary curves are not predicted as accurately. The inability of our model  
221 to replicate all of the experimental data may be a consequence of using a simple Hodgkin-Huxley  
222 model formulation, although it is a commonly used structure for currents within action potential  
223 models.

224 However, the simplicity of our model may also be the key to its success — with only eight  
225 kinetic parameters we have confidence that they are all being fitted well, and we have shown that  
226 there is low uncertainty in their values. As Pathmanathan & Gray<sup>27</sup> and Mirams *et al.*<sup>28</sup> have  
227 recently discussed, considering probabilistic uncertainty in our model parameters and predictions  
228 is evermore important as models begin to be used for safety-critical predictions such as the CiPA  
229 initiative<sup>18,19</sup> and clinical applications<sup>34</sup>.

230 A key limitation of our approach is that experiments have been performed in expression line  
231 cells, creating a hERG1a model; compared to native  $I_{K_r}$  current in cardiac cells which will have  
232 additional isoforms, subunits and regulation. To characterize  $I_{K_r}$  kinetics we plan to apply the  
233 methodology presented here in native myocytes, to make a model that is more applicable for use in  
234 cardiac safety testing and whole-organ simulations.

235 The success of our approach in different ion channels will be heavily dependent on the precise

236 form of the sinusoidal protocol that is used, and in parallel work we are developing different strategies  
237 for optimizing the voltage protocol design for given currents. Previously, Bett *et al.*<sup>1</sup> explored the  
238 behaviors of a subset of existing hERG channel models and concluded that the model proposed by  
239 Wang *et al.*<sup>25</sup> was best able to replicate the activation kinetics of the hERG channel. In parallel work,  
240 we are extending the approach presented here for selecting and calibrating the most appropriate  
241 model structure for hERG channel kinetics (see Supplementary Material Figure B4 for the range of  
242 possibilities).

243 We have demonstrated the advantages of a cell-specific mathematical modeling approach, ob-  
244 serving an overall improvement in model predictions using cell-specific models relative to a model  
245 made using averaged data. The approach therefore allows, for perhaps the first time, an exploration  
246 of both within-cell and between-cell variability in ion channel kinetics. The cell-specific predictions  
247 are particularly strong when using the highest quality data, highlighting the necessity of maintain-  
248 ing very high data quality for constructing accurate and robust mathematical models of ion channel  
249 kinetics.

250 The significant time saving of our short protocol opens up the possibility of taking more record-  
251 ings in different experimental conditions within a single cell (e.g. drug concentrations<sup>35,36</sup> or tem-  
252 peratures<sup>37</sup>), leading to datasets that are more consistent, and therefore of higher quality. These  
253 datasets will result in more accurate mathematical descriptions of ionic currents in these different  
254 conditions. The approach we have presented allows more predictive mathematical models of ion  
255 channel kinetics to be formulated, which will lead to more accurate predictions of ion currents in  
256 different organ systems.

## 257 Acknowledgments

258 Our thanks to Prof. Gail Robertson of University of Wisconsin–Madison for assistance in acquiring  
259 the cell line used in pilot stages of this study. We would also like to thank the following people for  
260 technical assistance, access to facilities, support and encouragement: Jim Louttit, Nick McMahon,  
261 Carol Wilson, Sam Turner, Kate Harris and Sara Graham of GSK Safety Assessment; Jules Hancox  
262 of University of Bristol; Monique Windley and Mark Hunter of Victor Chang Cardiac Research  
263 Institute; Rianne Rijken and Birgit Goversen of UMC Utrecht. Thanks to Ross Johnstone (Uni-  
264 versity of Oxford) for removing singularities from the Zeng model, and to Frank Ball (University of  
265 Nottingham) for comments on a paper draft.

266 KAB was supported by the EPSRC and GlaxoSmithKline Plc (grant numbers EP/G037280/1,  
267 EP/I017909/1 and EP/K503769/1). JIV and APH acknowledge funding from the NHMRC. RB  
268 acknowledges support from ANR grant BoB ANR-16-CE23-0003. GRM gratefully acknowledges  
269 support from a Sir Henry Dale Fellowship jointly funded by the Wellcome Trust and the Royal  
270 Society (grant number 101222/Z/13/Z).

## 271 Author Contributions

272 KAB, RB, YC, DJG, TdeB, GRM designed the study and modeling approach; KAB, RB & GRM  
273 designed and implemented the statistical methods; KAB, GRM, JIV, APH and TdeB designed and  
274 refined the experimental methods; KAB performed all the experiments, simulations and statistical  
275 analysis; KAB, TdeB, GRM wrote the manuscript; all authors approved the final version of the  
276 manuscript.

## 277 Competing Financial Interests

278 The authors declare that the research was conducted in the absence of any commercial or financial  
279 relationships that could be construed as a potential conflict of interest.

## 280 Disclaimer

281 The opinions presented here are those of the authors. No official support or endorsement by the  
282 Food & Drug Administration is intended nor should be inferred.

## 283 Materials & Correspondence

284 All computational codes, and the experimental current recordings that were used for calibration and  
285 validation (leak and dofetilide subtracted), are openly available in a Supplementary Data reposi-  
286 tory at <https://github.com/mirams/sine-wave>. A permanently archived version is available on  
287 Figshare at <https://doi.org/10.6084/m9.figshare.4704550.v2> alongside the full raw data (in  
288 both plain text and PClamp formats) at <https://doi.org/10.6084/m9.figshare.4702546.v1>.  
289 K.A.B. is the corresponding author.

## 290 References

- 291 1. Bett, G. C., Zhou, Q. & Rasmusson, R. L. Models of HERG Gating. *Biophysical Journal* **101**,  
292 631–642 (2011).
- 293 2. Vandenberg, J. *et al.* hERG K<sup>+</sup> channels: Structure, function, and clinical significance. *Physi-*  
294 *ological Reviews* **92**, 1393–1478 (2012).
- 295 3. Balsler, J. R., Roden, D. M. & Bennett, P. B. Global parameter optimization for cardiac  
296 potassium channel gating models. *Biophysical journal* **57**, 433–44 (Mar. 1990).
- 297 4. Cannon, R. C. & D’Alessandro, G. The ion channel inverse problem: neuroinformatics meets  
298 biophysics. *PLoS Comput Biol* **2**, e91 (2006).
- 299 5. Siekmann, I. *et al.* MCMC estimation of Markov models for ion channels. *Biophysical journal*  
300 **100**, 1919–29 (Apr. 2011).
- 301 6. Siekmann, I., Sneyd, J. & Crampin, E. J. MCMC can detect nonidentifiable models. *Biophysical*  
302 *journal* **103**, 2275–86 (Dec. 2012).
- 303 7. Loewe, A. *et al.* Parameter Estimation of Ion Current Formulations Requires Hybrid Optimiza-  
304 tion Approach to Be Both Accurate and Reliable. *Frontiers in bioengineering and biotechnology*  
305 **3**, 209 (Jan. 2015).
- 306 8. Tomaiuolo, M., Bertram, R., Leng, G. & Tabak, J. Models of Electrical Activity: Calibration  
307 and Prediction Testing on the Same Cell. *Biophysical Journal* **103**, 2021–2032 (2012).
- 308 9. Trudeau, M. C., Warmke, J. W., Ganetzky, B. & Robertson, G. A. HERG, a human inward  
309 rectifier in the voltage-gated potassium channel family. *Science* **269**, 92 (1995).
- 310 10. Sanguinetti, M., Jiang, C., Curran, M. & Keating, M. A mechanistic link between an inherited  
311 and an acquired cardiac arrhythmia: HERG encodes the IKr potassium channel. *Cell* **81**, 299–  
312 307 (1995).
- 313 11. Babcock, J. J. & Li, M. hERG channel function: beyond long QT. *Acta Pharmacologica Sinica*  
314 **34**, 329–35 (2013).

- 315 12. Farrelly, A. M. *et al.* Expression and function of KCNH2 (HERG) in the human jejunum.  
316 *American journal of physiology. Gastrointestinal and liver physiology* **284**, G883–95 (2003).
- 317 13. Parkington, H. C. *et al.* Diminished hERG K<sup>+</sup> channel activity facilitates strong human labour  
318 contractions but is dysregulated in obese women. *Nature communications* **5**, 4108 (2014).
- 319 14. Jehle, J., Schweizer, P. A., Katus, H. A. & Thomas, D. Novel roles for hERG K(+) channels  
320 in cell proliferation and apoptosis. *Cell death & disease* **2**, e193 (2011).
- 321 15. Lastraioli, E. *et al.* hERG1 channels drive tumour malignancy and may serve as prognostic  
322 factor in pancreatic ductal adenocarcinoma. *British Journal of Cancer* **112**, 1076–87 (2015).
- 323 16. Redfern, W. *et al.* Relationships between preclinical cardiac electrophysiology, clinical QT in-  
324 terval prolongation and torsade de pointes for a broad range of drugs: Evidence for a provisional  
325 safety margin in drug development. *Cardiovascular Research* **58**, 32 (2003).
- 326 17. Pollard, C. E. *et al.* An introduction to QT interval prolongation and non-clinical approaches  
327 to assessing and reducing risk. *British Journal of Pharmacology* **159**, 12–21 (2010).
- 328 18. Sager, P., Gintant, G., Turner, J., Pettit, S. & Stockbridge, N. Rechanneling the cardiac proar-  
329 rhythmia safety paradigm: a meeting report from the Cardiac Safety Research Consortium.  
330 *American Heart Journal* **167**, 292–300 (2014).
- 331 19. Fermini, B. *et al.* A New Perspective in the Field of Cardiac Safety Testing through the  
332 Comprehensive In Vitro Proarrhythmia Assay Paradigm. *Journal of Biomolecular Screening*  
333 **21**, 1–11 (2016).
- 334 20. Hodgkin, A. L. & Huxley, A. F. A quantitative description of membrane current and its  
335 application to conduction and excitation in nerve. *J. Physiol.* **117**, 500–544 (1952).
- 336 21. Hobbs, K. H. & Hooper, S. L. Using complicated, wide dynamic range driving to develop  
337 models of single neurons in single recording sessions. *Journal of Neurophysiology* **99**, 1871–  
338 1883 (2008).
- 339 22. Fink, M. & Noble, D. Markov models for ion channels: versatility versus identifiability and  
340 speed. *Philosophical Transactions of the Royal Society A* **367**, 2161–2179 (2009).
- 341 23. Groenendaal, W. *et al.* Cell-Specific Cardiac Electrophysiology Models. *PLoS Computational*  
342 *Biology* **11**, e1004242 (Apr. 2015).
- 343 24. Kargol, A., Hosein-Sooklal, A., Constantin, L. & Przewalski, M. Application of oscillating  
344 potentials to the Shaker potassium channel. *General Physiology and Biophysics* **23**, 53–76  
345 (2004).
- 346 25. Wang, S., Liu, S., Morales, M., Strauss, H. & Rasmusson, R. A quantitative analysis of the  
347 activation and inactivation kinetics of HERG expressed in *Xenopus* oocytes. *The Journal of*  
348 *Physiology* **502**, 45–60 (1997).
- 349 26. Zhou, Z. *et al.* Properties of HERG channels stably expressed in HEK 293 cells studied at  
350 physiological temperature. *Biophysical Journal* **74**, 230–241 (1998).
- 351 27. Pathmanathan, P. & Gray, R. A. Ensuring reliability of safety-critical clinical applications of  
352 computational cardiac models. *Frontiers in Physiology* **4**, 1–9 (2013).
- 353 28. Mirams, G. R., Pathmanathan, P., Gray, R. A., Challenor, P. & Clayton, R. H. White paper:  
354 Uncertainty and variability in computational and mathematical models of cardiac physiology.  
355 *The Journal of Physiology* **594**, 6833–6847 (2016).

- 356 29. Hansen, N., Muller, S. & Koumoutsakos, P. Reducing the time complexity of the derandomized  
357 evolution strategy with covariance matrix adaptation (CMA-ES). *Evolutionary Computation*  
358 **11**, 1–18 (2003).
- 359 30. Zeng, J., Laurita, K. R., Rosenbaum, D. S. & Rudy, Y. Two components of the delayed rectifier  
360 K<sup>+</sup> current in ventricular myocytes of the guinea pig type theoretical formulation and their  
361 role in repolarization. *Circulation Research* **77**, 140–152 (1995).
- 362 31. Mazhari, R., Greenstein, J., Winslow, R., Marbán, E. & Nuss, H. Molecular interactions be-  
363 tween two Long-QT syndrome gene products, HERG and KCNE2, rationalized by in vitro and  
364 in silico analysis. *Circulation Research* **89**, 33–38 (2001).
- 365 32. Ten Tusscher, K., Noble, D., Noble, P. & Panfilov, A. A model for human ventricular tissue.  
366 *American Journal of Physiology-Heart and Circulatory Physiology* **286**, H1573–H1589 (2004).
- 367 33. Di Veroli, G., Davies, M., Zhang, H., Abi-Gerges, N. & Boyett, M. High-throughput screening  
368 of drug-binding dynamics to HERG improves early drug safety assessment. *American Journal*  
369 *of Physiology-Heart and Circulatory Physiology* **304**, H104–H117 (2013).
- 370 34. Arevalo, H. J. *et al.* Arrhythmia risk stratification of patients after myocardial infarction using  
371 personalized heart models. *Nature communications* **7** (2016).
- 372 35. Pearlstein, R. A. *et al.* Implications of Dynamic Occupancy, Binding Kinetics, and Chan-  
373 nel Gating Kinetics for hERG Blocker Safety Assessment and Mitigation. *Current Topics in*  
374 *Medicinal Chemistry* **16**, 1792–818 (2016).
- 375 36. Lee, W. *et al.* In silico assessment of kinetics and state dependent binding properties of drugs  
376 causing acquired LQTS. *Progress in biophysics and molecular biology* **120**, 89–99 (2016).
- 377 37. Vandenberg, J. I. *et al.* Temperature dependence of human ether-a-go-go-related gene K<sup>+</sup>  
378 currents. *American journal of physiology. Cell physiology* **291**, C165–75 (2006).



## 379 4 Online Methods

### 380 4.1 Experimental methods

#### 381 4.1.1 Cell Culture

382 Chinese Hamster Ovary (CHO) cells stably expressing Kv11.1 were used in the patch clamp exper-  
383 iments performed in this study. Cells were cultured in Ham’s F12 nutrient mix containing 5% fetal  
384 bovine serum and maintained at 37°C with 5% CO<sub>2</sub>.

#### 385 4.1.2 Electrophysiology Solutions

386 The bath solution was composed of: NaCl (137 mM), KCl (4 mM), MgCl<sub>2</sub> (1 mM), HEPES (10 mM),  
387 glucose (10 mM), and CaCl<sub>2</sub> (1.8 mM). The pH of the solution was adjusted to 7.4 with NaOH.  
388 Borosilicate glass micropipettes were pulled and fire polished to final tip resistances of approxi-  
389 mately 2–5 MΩ when filled with pipette solution containing: KCl (130 mM), MgCl<sub>2</sub> (1 mM), HEPES  
390 (10 mM), EGTA (5 mM), and MgATP (5 mM). pH of the solution was adjusted to 7.2 with KOH.  
391 All experiments were performed at room temperature (21–22°C). Using this temperature and the  
392 composition of the bath and pipette solutions, a K<sup>+</sup> reversal potential of approximately -88.4 mV  
393 was calculated using the Nernst potential (equation (8)), the exact value depending on the particular  
394 temperature of each experimental recording.

#### 395 4.1.3 Recording Techniques

396 Current recordings were made using an Axopatch 200B amplifier in whole-cell patch clamp mode.  
397 Data acquisition was performed using pClamp 10 software (Molecular Devices, Sunnyvale, USA).  
398 The protocols were first created as text files and then converted to `.abf` stimulus files to make  
399 corresponding `.pro` protocol files in the pClamp 10 software. A CV 203BU amplifier headstage  
400 and a Digidata 1440A were used. A Sutter MP225 micromanipulator was used for positioning of  
401 the microelectrode. The current signal was sampled at a rate of 10 kHz. 75–80% series resistance  
402 compensation was applied and data were 5 kHz low pass Bessel filtered by the hardware. No  
403 software filtering was applied. Whole-cell capacitance compensation was applied electronically.  
404 Leak subtraction was applied offline by using a 50 ms leak step to allow correction. To make a series  
405 of successive recordings using different protocols on the same cell, the pClamp “Sequencing Keys”  
406 tool was utilized, with a `.sks` file detailing the sequence the protocols should be performed in.

## 407 4.2 Experimental Protocols

408 For each cell we recorded a series of standard voltage-step protocols, a protocol comprised of a  
409 series of action potentials and the sine wave protocol, as shown schematically in Figure 1B. In all  
410 protocols the holding potential was initially held at -80 mV before applying a 50 ms leak step to  
411 -120 mV before returning back to -80 mV, with this step being used to estimate the leak current (as  
412 described in Section 4.3). Note that the ‘standard’ voltage-step protocols we have used to test our  
413 approach are shorter than some of those which have previously been used to calibrate mathematical  
414 models (with fewer test voltages/timings used) in order to perform them all in a single cell, with and  
415 without dofetilide subtraction, so a ‘traditional approach’ would take longer than the experiment  
416 performed here, perhaps requiring multiple cells. The voltage step to -120 mV at the end of all the  
417 protocols ensures that channels close quickly, reducing the time needed between protocols to regain  
418 a steady closed state.

## 419 **Protocol 0 — Repeated activation step**

420 Before the start of each set of recordings on each cell an activation step protocol with a start-to-start  
421 interval of 12 seconds was repeated several times until consistent currents were observed on each  
422 repeat. From an initial holding potential of  $-80$  mV, this protocol comprised a 5 s step to 10 mV  
423 followed by a 5 s step to  $-50$  mV before returning again to a holding potential of  $-80$  mV. This  
424 protocol is depicted in Supplementary Figure A1. We repeated this protocol while dofetilide was  
425 added (see Figure 1B) and the current traces recorded from this protocol were used to assess when  
426 a steady level of dofetilide block had been reached.

## 427 **Protocols 1,2 — Activation Kinetics**

428 After the initial period at holding potential incorporating the  $-120$  mV leak step, a step to  $V_{step1}$   
429 followed and was held at that voltage for  $T_{step}$  ms, before a step to  $-120$  mV for 2.5 s, before  
430 returning to holding potential of  $-80$  mV for 1 second. The protocol was repeated 6 times with a  
431 different  $T_{step}$  on each repeat.  $T_{step}$  took the values of 3, 10, 30, 100, 300 and 1000 ms.

- 432 • For Protocol 1,  $V_{step1}$  is 0 mV. This protocol is depicted in Supplementary Figure A2.
- 433 • For Protocol 2,  $V_{step1}$  is  $+40$  mV. This protocol is depicted in Supplementary Figure A3.

## 434 **Protocol 3 — Steady-State Activation**

435 From the initial period at holding potential incorporating the  $-120$  mV leak step, a step to  $V_{step}$   
436 was applied for 5 seconds, followed by a 1 s step to  $-40$  mV, before a 500 ms step to  $-120$  mV, and  
437 then returning back to holding potential for one second. This process was repeated 7 times with a  
438 different  $V_{step}$  on each repeat.  $V_{step}$  ranged from  $-60$  mV to  $+60$  mV in 20 mV increments. This  
439 protocol is depicted in Figure 4A (left column).

## 440 **Protocol 4 — Inactivation**

441 From the initial period at holding potential incorporating the  $-120$  mV leak step, a step to 50 mV  
442 for 600 ms, and a step to  $-90$  mV for 60 ms, followed by a step to  $V_{step}$  for 150 ms, before a 500 ms  
443 step to  $-120$  mV, and a 1 s step back to holding potential of  $-80$  mV; This was repeated 16 times  
444 with a different  $V_{step}$  on each repeat.  $V_{step}$  ranged from  $-100$  mV to 50 mV in 10 mV increments.  
445 This protocol is depicted in Figure 4A (middle column).

## 446 **Protocol 5 — Deactivation**

447 From the initial period at holding potential incorporating the  $-120$  mV leak step, a step to 50 mV  
448 for 2 s was applied, followed by a step to  $V_{step}$  for 6 s, before a 500 ms step to  $-120$  mV, and then  
449 returning back to holding potential for one second. This process was repeated 9 times with a  
450 different  $V_{step}$  on each repeat.  $V_{step}$  ranged from  $-120$  mV to  $-40$  mV in 10 mV increments. This  
451 protocol is depicted in Figure 4A (right column).

## 452 **Protocol 6 — Action Potentials**

453 This protocol was formed by combining a series of different simulated action potentials from the  
454 Cardiac Electrophysiology Web Lab<sup>38</sup> (and we added some simulated action potentials where early  
455 after depolarizations and delayed after depolarizations had been induced). The range of models we  
456 used for the simulations encompassed different cell types and species, the action potentials were

457 shifted slightly so that their resting potentials were exactly  $-80$  mV (see the Supplementary Code  
458 for full details and code to reproduce this protocol).

#### 459 **Protocol 7 — Sine Wave Protocol**

460 The training protocol took the form of 250 ms at holding potential of  $-80$  mV, followed by a 50 ms  
461 leak step to  $-120$  mV, and then 200 ms back at  $-80$  mV. This was followed by a 1 s step to 40 mV,  
462 and a 500 ms step to  $-120$  mV, before returning to  $-80$  mV for 1 second. The 3.5 s sine wave  
463 portion of the protocol then followed (the form of which is described below), before a 500 ms step  
464 to  $-120$  mV, and a return to  $-80$  mV for 1 s.

465 The sine wave portion of the protocol takes the form of a sum of three sine waves as shown in  
466 Equation 1.

$$V(t) = -30 + A_1 \sin(2\pi\omega_1(t - 2500)) + A_2 \sin(2\pi\omega_2(t - 2500)) + A_3 \sin(2\pi\omega_3(t - 2500)), \quad (1)$$

467 where  $A_1 = 54$  mV,  $A_2 = 26$  mV,  $A_3 = 10$  mV,  $\omega_1 = 0.007/(2\pi)$ ,  $\omega_2 = 0.037/(2\pi)$  and  $\omega_3 =$   
468  $0.19/(2\pi)$ , and  $t$  is time measured in milliseconds.

469 The protocol was initially designed with just the  $-120$  mV leak step and not the additional  
470 steps to 40 mV and  $-120$  mV (which were included after preliminary experiments as described in  
471 Supplementary Material A2.1) and so the sine wave was shifted by  $-2500$  ms (as shown in equation  
472 (1)) to begin at the same phase after we incorporated the additional steps.

473 All of the protocols described in this section were adjusted on the amplifier to account for  
474 the liquid junction potential which was calculated to be 4.1 mV from the ionic composition of our  
475 physiological solutions which are described in Section 4.1.2. The liquid junction potential was  
476 calculated using the junction potential calculator in the pClamp software.

#### 477 **4.3 Leak Correction**

478 We used the leak-step from  $-80$  mV to  $-120$  mV in order to leak-correct the experimental data,  
479 according to:

$$I_{\text{corrected}} = I_{\text{raw}} - V/R_{\text{leak}}. \quad (2)$$

480 Leak subtraction was performed using a MatLab script written for this purpose. We identified the  
481 most appropriate  $R_{\text{leak}}$  value to minimize the difference between the mean current value during  
482 the leak step (to  $-120$  mV) compared to the mean value at a holding potential of  $-80$  mV, whilst  
483 ensuring that the trace was not over-corrected (which would result in negative currents during the  
484 initial stages of activation). We manually selected leak resistances to correct the current evoked by  
485 the sine wave protocol in both vehicle and dofetilide conditions. We then applied this leak resistance  
486 to the remaining protocols performed in the same condition on each cell. The mean current during  
487 the  $-80$  mV step was calculated from 200 ms of the  $-80$  mV holding period before the  $-120$  mV  
488 leak step (not including the capacitive spike at the point at which the step occurs). The baseline  
489 current at a holding potential of  $-80$  mV was then adjusted back to 0 nA with a constant additive  
490 current if required.

#### 491 **4.4 Dofetilide Subtraction**

492 In preliminary work in HEK cells we observed that our sine wave protocols could elicit endogenous  
493 currents, potentially interfering with the predictive ability of the resulting mathematical models.  
494 To overcome this technical issue we first constrained the design of the sine wave protocol so that  
495 only voltages within a physiological range of  $-120$  mV to  $+60$  mV were explored. In addition, we

496 repeated all the voltage protocols described above both in vehicle conditions and in the presence  
497 of  $0.3 \mu\text{M}$  dofetilide. We then subtracted the currents remaining in the presence of the moderate  
498 dose of dofetilide from those recorded in the vehicle to remove any contribution of endogenous  
499 currents (and to produce what we refer to as ‘dofetilide subtracted’ data). Prior to performing  
500 this subtraction, we first leak subtracted both the vehicle and dofetilide recordings individually, as  
501 described above.

502 The required dose of dofetilide was obtained by serial dilution. Dofetilide was first dissolved  
503 in Dimethyl sulfoxide (DMSO) before being added to the bath solution to produce the required  
504 concentrations.

505 We observed that the levels of endogenous currents the protocols elicited varied from cell to cell  
506 (and were generally much lower in the CHO cells used in this study than in the HEK cells used  
507 in pilot studies). It may not always be necessary for dofetilide subtraction to be performed on the  
508 data, but we applied this method nonetheless to generate a gold-standard dataset.

#### 509 4.5 Deriving I–V Curves and Time constant-V Curves

510 To derive time constant-voltage relationships from experimental data and simulated data traces,  
511 we used the Levenberg-Marquardt algorithm with a tolerance of  $10^{-6}$  within Clampfit v10.5. To  
512 derive the instantaneous inactivation time constant curves shown in Figure 4 (inactivation column,  
513 row D) we fitted a single exponential to the current responses during the 150 ms  $V_{step}$ , as  
514 defined in the inactivation protocol (Pr4) description above.

515 To produce the deactivation and recovery from inactivation rate time constant–voltage relation-  
516 ship for the experimental data traces, we fitted a triple exponential through the experimental data  
517 trace from the deactivation protocol (Pr 5). The section of the data used for fitting is the current  
518 in response to the 6 second  $V_{step}$ . Both this region of experimental data used for fitting and that  
519 for the instantaneous inactivation time constant described above are highlighted in row B of Figure  
520 4. The fastest time constant from the triple exponential fit to each test step corresponded to the  
521 recovery from inactivation time constant. We then used the weights of the remaining two time con-  
522 stants from each triple exponential fit to produce a single weighted time constant for deactivation<sup>39</sup>.  
523 To derive the deactivation and recovery from inactivation time constants from simulated data we  
524 fitted a double exponential through the current in response to the 6 second  $V_{step}$  section of the  
525 deactivation protocol. Again, we used the faster time constant as the recovery from inactivation  
526 time constant and the slower time constant as that for deactivation.

527 To produce the peak current-voltage relationship for the steady state activation protocol for the  
528 simulated data traces we wrote MatLab code to identify the peak current in the region between  
529 5.6292 and 5.7292 seconds on each sweep of the protocol, which corresponds to the current response  
530 just after the 5 second  $V_{step}$  when the voltage is stepped to  $-40 \text{ mV}$ . We then normalized the peak  
531 current data to the maximum overall peak identified in this region to produce the current-voltage  
532 relationship curve. For the simulated data we wrote a MatLab script (for additional details see  
533 Supplementary Code) to identify the peak-current voltage relationship for this protocol but for the  
534 experimental traces we verified these peak points manually to avoid incorrect peaks being identified  
535 due to noise or capacitive effects. We also identified the peak currents in the currents evoked by  
536 the activation kinetics protocols manually for the same reason. In the activation kinetics protocol  
537 we identified the peak currents during the  $V_{step}$  for each interval of  $T_{step}$  duration.

## 538 4.6 Mathematical Model Equations

539 The system of ordinary differential equations underlying the mathematical model structure shown  
540 in Figure 3B is as follows;

$$\frac{dC}{dt} = -(k_1 + k_3)C + k_2O + k_4IC, \quad (3)$$

$$\frac{dO}{dt} = -(k_2 + k_3)O + k_1C + k_4IO, \quad (4)$$

$$\frac{dIO}{dt} = -(k_2 + k_4)IO + k_3O + k_1IC, \quad (5)$$

543 where

$$IC = 1 - C - O - IO. \quad (6)$$

544 The eight parameters  $P_1$  to  $P_8$  determine the rates  $k_1$  to  $k_4$  as shown in Figure 3B. The current,  
545  $I_{Kr}$ , is modeled with a standard Ohmic expression:

$$I_{Kr} = G_{Kr}O(V - E_K), \quad (7)$$

546 where  $G_{Kr}$  is the maximal conductance,  $E_K$  is the Nernst potential for potassium ions, and  $O$  is  
547 the open probability, given by the solution to the system of equations above.  $E_K$  is calculated from  
548 the ratio of ion concentrations on each side of the cell membrane:

$$E_K = \frac{RT}{zF} \left( \frac{[K]_{out}}{[K]_{in}} \right). \quad (8)$$

549 where  $R$  is the ideal gas constant,  $T$  is the temperature,  $F$  is the Faraday constant,  $z$  is the valency  
550 of the ions (in this case 1), and  $[K]$  represents the concentration of potassium ions. Note that this  
551 expression has a temperature dependence, and the temperature of the bath was recorded for each  
552 cell and used in relevant simulations.

553 All simulations were performed in MatLab. Mex functions were used to define and simulate  
554 each hERG channel model with CVODE<sup>40</sup> used to solve the systems of differential equations, with  
555 both absolute and relative tolerances set to  $10^{-8}$ . Code is available to download as described at the  
556 end of the main manuscript.

## 557 4.7 Parameter Inference

558 Parameters were estimated using a Bayesian Inference scheme similar to that described in Johnstone  
559 *et al.*<sup>41</sup>. Here we outline the likelihood function formulation. In Supplementary Material A2 we  
560 give details of how this likelihood is used to generate a posterior distribution for the parameter set.

### 561 4.7.1 Likelihood formulation

562 For an observed experimental recording which we will denote  $\mathbf{y}$ , we can infer the probability of dif-  
563 ferent combinations of model parameters  $\theta$ . Bayes' rule underpins this approach which is expressed  
564 as

$$P(\theta|\mathbf{y}) = \frac{P(\mathbf{y}|\theta)P(\theta)}{P(\mathbf{y})} \quad (9)$$

565  $P(\theta|\mathbf{y})$  is a probability density that encodes our belief that the parameters of the model are in a  
566 neighborhood of  $\theta$  after observing the experimental data  $\mathbf{y}$ , and is termed the *posterior probability*  
567 *density*.  $P(\mathbf{y}|\theta)$  is the probability density that corresponds to the probabilistic generation of the

568 experimental data  $\mathbf{y}$  given a model parameterized with parameters  $\theta$ .  $P(\theta)$  encapsulates our beliefs  
569 about  $\theta$  before observing any experimental data and is termed the *prior distribution* (details of the  
570 prior that we used are in Supplementary Material A2.2).  $P(\mathbf{y})$  is a normalizing term which is the  
571 integral of all possible probabilities  $P(\mathbf{y}|\theta)$  and ensures that the posterior density  $P(\theta|\mathbf{y})$  integrates  
572 to 1. In practice this normalizing term is calculated by

$$P(\mathbf{y}) = \int P(\mathbf{y}|\theta)P(\theta)d\theta. \quad (10)$$

573 A Bayesian inference approach to parameter estimation combines beliefs about the parameters in the  
574 prior distribution  $P(\theta)$  with the *likelihood*  $P(\mathbf{y}|\theta)$  to determine the posterior probability distribution  
575  $P(\theta|\mathbf{y})$ .

576 We define the likelihood

$$L(\theta|\mathbf{y}) = P(\mathbf{y}|\theta) \quad (11)$$

577 to insist on the fact that we consider it as a function of  $\theta$ , with  $\mathbf{y}$  kept fixed at the observation  
578 values. Bayes' rule (in Equation (9)) can be rewritten in terms of likelihood as

$$P(\theta|\mathbf{y}) \propto P(\theta)L(\theta|\mathbf{y}). \quad (12)$$

579 When the prior distribution is assumed to be uniform (as it is in this study), we can make inferences  
580 based on just the likelihood, as the prior  $P(\theta)$  is either constant or zero. If a proposed parameter  
581 is outside our chosen prior then likelihood is 0 and we simply record that this parameter set has a  
582 likelihood of 0 and propose another parameter set.

583 We assume that the errors at each time point are independent and so the conditional probability  
584 density of observing the whole experimental trace from time sample 0 to time sample  $T$  given the  
585 model parameter set  $\theta$  is

$$L(\theta|\mathbf{y}) = \prod_{t=0}^T P(y_t|\theta). \quad (13)$$

586 We assume that the experimental noise is independently and normally distributed with a mean  
587 of zero and variance of  $\sigma^2$ . The likelihood is then expressed as

$$L(\theta|\mathbf{y}) = \prod_{t=0}^T \mathcal{N}(y_t|f_t(\theta), \sigma^2) = \prod_{t=0}^T \frac{1}{\sqrt{2\pi\sigma^2}} \exp\left(-\frac{(y_t - f_t(\theta))^2}{2\sigma^2}\right). \quad (14)$$

588 In our case  $f_t(\theta)$  is the predicted current at each time point given the parameters, this is given by  
589 equation (7) after solving the model system (equations (3)–(6)). Calculating equation (14) requires  
590 the evaluation of the product of many numbers less than 1, so it is more numerically convenient to  
591 calculate the *log-likelihood* instead. As our aim is to identify parameter sets  $\theta$  which maximize the  
592 likelihood in equation (14), maximizing the likelihood is equivalent to maximizing the log-likelihood:

$$\log(L(\theta|\mathbf{y})) = -\frac{1}{2} \sum_{t=0}^T \log(2\pi\sigma^2) - \frac{1}{2} \sum_{t=0}^T \frac{(y_t - f_t(\theta))^2}{\sigma^2}. \quad (15)$$

593 In practice, the sums over time in equation (15) are formulated so that we exclude time points  
594 from regions where the data are affected by capacitive spikes. To be precise, we exclude 10 ms  
595 intervals following step-changes in the imposed voltage clamp. In the sine wave protocol (Pr7) these  
596 step-changes occur at 0.25 seconds, 0.3 seconds, 0.5 seconds, 1.5 seconds, 2 seconds, 3 seconds, 6.5  
597 seconds and 7 seconds (spikes are seen in experimental recordings at these times in Figure 2).

## 598 4.8 Note on Normalization

599 Where existing literature model simulations were plotted alongside experimental traces, or one  
600 experimental trace was compared with another, we first had to normalize to account for differences  
601 in conductance values and allow clearer comparison. This was achieved by selecting a scaling factor  
602 for the conductance value for each model simulation (or experimental trace) that minimized the  
603 square difference between each trace and a reference experimental trace.

604 For literature models the reference trace was the experimental current from the action potential  
605 clamp Pr6. Note this provides a best-case fit for Pr6 all of the models, removing the possibility that  
606 some models open ‘half as much’ because they have ‘twice the conductance’. For the new model, no  
607 scaling was applied and conductance was directly fitted to the experimental current from the sine  
608 wave protocol (along with other parameters).

## 609 References

- 610 38. Cooper, J., Scharm, M. & Mirams, G. R. The cardiac electrophysiology web lab. *Biophysical*  
611 *journal* **110**, 292–300 (2016).
- 612 39. Lacroix, J. J., Labro, A. J. & Bezanilla, F. Properties of deactivation gating currents in Shaker  
613 channels. *Biophysical journal* **100**, L28–L30 (2011).
- 614 40. Hindmarsh, A. *et al.* SUNDIALS: Suite of nonlinear and differential/algebraic equation solvers.  
615 *ACM Trans. Math. Software (TOMS)* **31**, 363–396 (2005).
- 616 41. Johnstone, R. H. *et al.* Uncertainty and variability in models of the cardiac action potential:  
617 Can we build trustworthy models? *Journal of Molecular and Cellular Cardiology* **96**, 49–62  
618 (2016).
